# Supplementary material for: Depression and Anxiety in Rosacea Patients: A Systematic Review and Meta-Analysis
Source: Springer Nature journal article supplement (doi:10.1007/s13555-021-00613-w), 2021-10-18
Supplement: MOESM1 [file 19768302]

# ***Depression and Anxiety in Rosacea Patients: A Systematic Review and Meta-Analysis***

Ru Dai, MD<sup>1</sup>; BingJiang, Lin<sup>3</sup>; Xuotong Zhang, MD<sup>1</sup>; Yuchen Lou, MD<sup>1</sup>; Suling Xu, BS<sup>2\*</sup>

<sup>1</sup>Department of Dermatology, Second Affiliated Hospital, School of Medicine, Zhejiang University, No. 88 Jiefang Road, Hangzhou, Zhejiang, 310009, P.R. China

<sup>2</sup>Department of Dermatology, The affiliated Hospital of Medical School of Ningbo University, No. 247, Renmin Road, Ningbo, Zhejiang, 315010, P.R. China

<sup>3</sup> Department of Dermatology, Ningbo First Hospital, Zhejiang University, No. 59, Liuting Street, Ningbo, Zhejiang, 315010, China

**Short Title:** depression and anxiety in patients with rosacea

**\*Corresponding Author:** Suling Xu, BS, Department of Dermatology, The affiliated Hospital of Medical School of Ningbo University, No. 247, Renmin Road, Ningbo, Zhejiang, 315010, P.R. China(Tel: 86+15201017376; Fax: 86+0574-87783581;E-mail: xusuling@nbu.edu.cn)

**Figure. S1. Sensitivity analysis of studies focusing on the odds ratios for depression and anxiety in rosacea patients compared with healthy controls**

(a) Depression

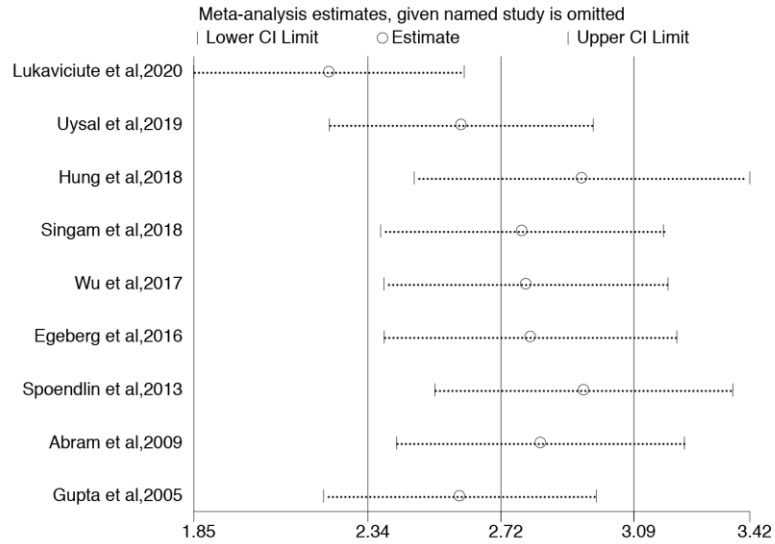

(b) Anxiety

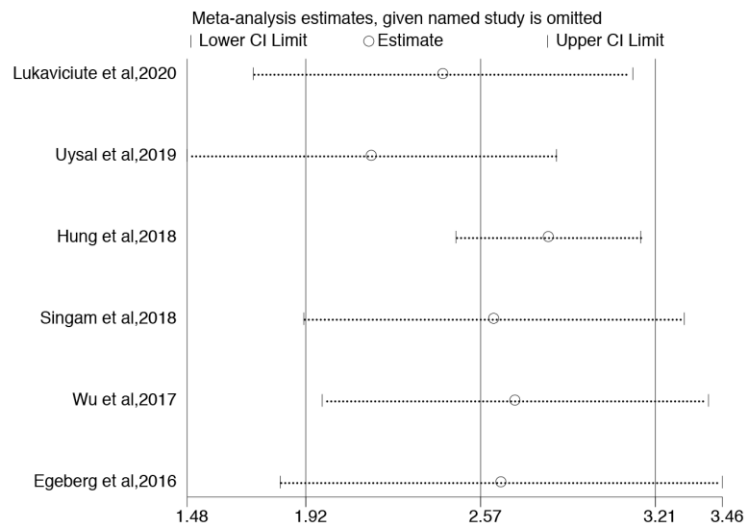

(a) Sensitivity analysis of studies focusing on depression.

(b) Sensitivity analysis of studies focusing on anxiety.

**Table S1. Study quality assessment using the Newcastle-Ottawa Scale**

| Study                   | Design          | Selection | Comparability | Outcome/exposure | Total |
|-------------------------|-----------------|-----------|---------------|------------------|-------|
| Lukaviciute et al. 2020 | Case-control    | 3         | 2             | 1                | 7     |
| Uysal et al, 2019       | Case-control    | 2         | 2             | 3                | 7     |
| Alinia et al, 2018      | Cross-sectional | 2         | /             | 3                | 5     |
| Huang et al, 2018       | Cohort          | 4         | 2             | 3                | 9     |
| Singam et al, 2018      | Cohort          | 3         | 2             | 3                | 8     |
| Wu et al, 2017          | Cross-sectional | 3         | 2             | 2                | 7     |
| Egeberg et al, 2016     | Cohort          | 4         | 2             | 3                | 9     |
| Halioua et al, 2016     | Cross-sectional | 3         | 2             | 2                | 7     |
| Dirschka et al, 2015    | Cross-sectional | 3         | 2             | 2                | 7     |
| Böhm et al, 2014        | Cross-sectional | 2         | 0             | 2                | 4     |
| Spoendlin et al, 2013   | Case-control    | 3         | 2             | 3                | 8     |
| Beaulieu et al, 2012    | Cross-sectional | 3         | /             | 2                | 5     |
| Abram et al, 2009       | Case-control    | 4         | 0             | 2                | 6     |
| Gupta et al, 2005       | Cohort          | 3         | 2             | 3                | 8     |
